# Supplementary material
Source: PubMed Central journal article supplement (PMC9703036)
Supplement: mmc1.pdf [file mmc1.pdf]

**Biophysical Journal, Volume 121**

**Supplemental information**

**Alterations induced by the PML-RAR $\alpha$  oncogene revealed by image  
cross correlation spectroscopy**

**Elena Cerutti, Morgana D'Amico, Isotta Cainero, Pier Giuseppe Pelicci, Mario  
Faretta, Gaetano Ivan Dellino, Alberto Diaspro, and Luca Lanza $\grave{n}$**

## SUPPORTING INFORMATION FOR:

# Alterations induced by the PML-RAR $\alpha$ oncogene revealed by Image Cross-Correlation Spectroscopy

Elena Cerutti<sup>1,2</sup>, Morgana D'Amico<sup>1</sup>, Isotta Cainero<sup>2</sup>, Pier Giuseppe Pelicci<sup>3,4</sup>, Mario Faretta<sup>3</sup>, Gaetano Ivan Dellino<sup>3,4,\*</sup>, Alberto Diaspro<sup>2,5</sup>, Luca Lanzanò<sup>1,2,\*</sup>

<sup>1</sup>Department of Physics and Astronomy "Ettore Majorana", University of Catania, Via S. Sofia 64, 95123 Catania, Italy

<sup>2</sup>Nanoscopy and NIC@IIT, CHT Erzelli, Istituto Italiano di Tecnologia, Via Enrico Melen 83, Building B, 16152 Genoa, Italy

<sup>3</sup>Department of Experimental Oncology, IEO, European Institute of Oncology IRCCS, 20100 Milan, Italy

<sup>4</sup>Department of Oncology and Hemato-Oncology, University of Milan, 20100 Milan, Italy

<sup>5</sup>DIFILAB, Department of Physics, University of Genoa, via Dodecaneso 33, 16143 Genoa, Italy

\*Corresponding authors: [luca.lanzano@unict.it](mailto:luca.lanzano@unict.it) ; [gaetano.dellino@ieo.it](mailto:gaetano.dellino@ieo.it)

Content:

Supporting Figure S1-S4

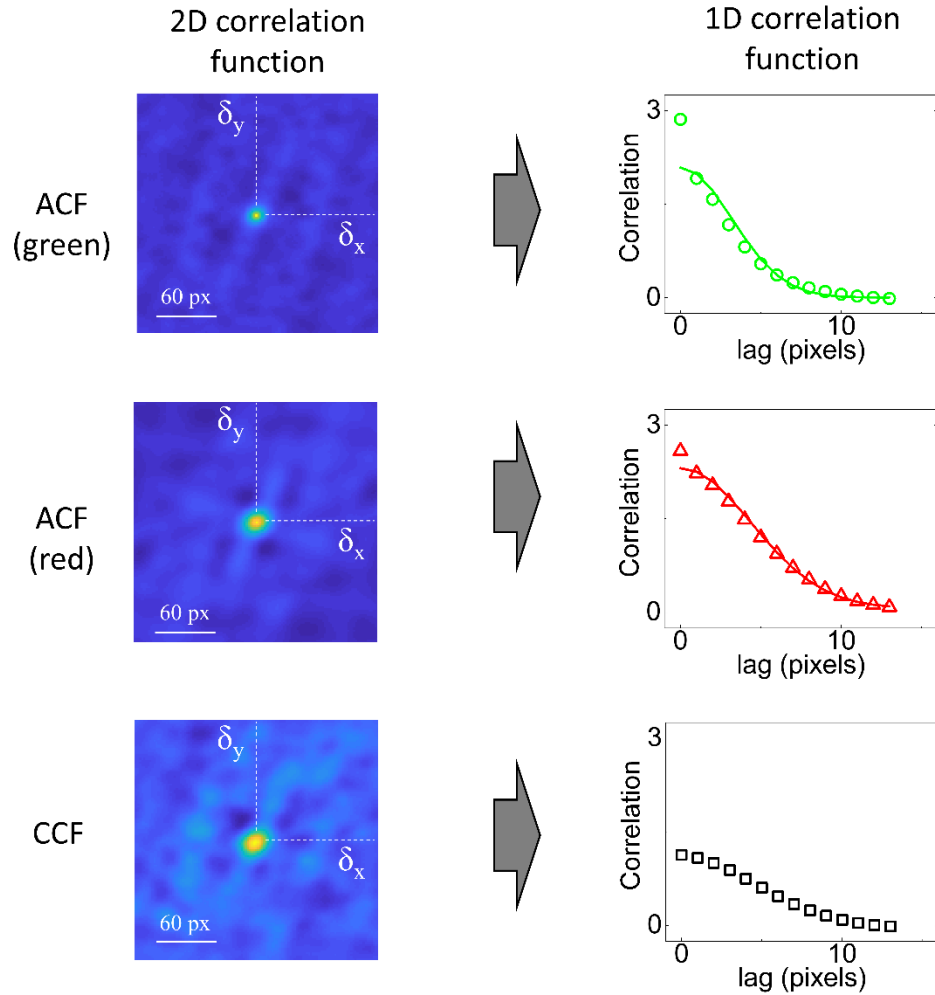

**Fig. S1. Generation of the 1D spatial correlation functions.**

Representative 2D spatial correlation functions (left) and corresponding 1D spatial correlation functions (right) obtained by angular averaging. Shown are (from top to bottom) the autocorrelation function (ACF) of the green and red channel and the cross-correlation function (CCF). The shown correlation functions are calculated from the image shown in Fig.2B.

A

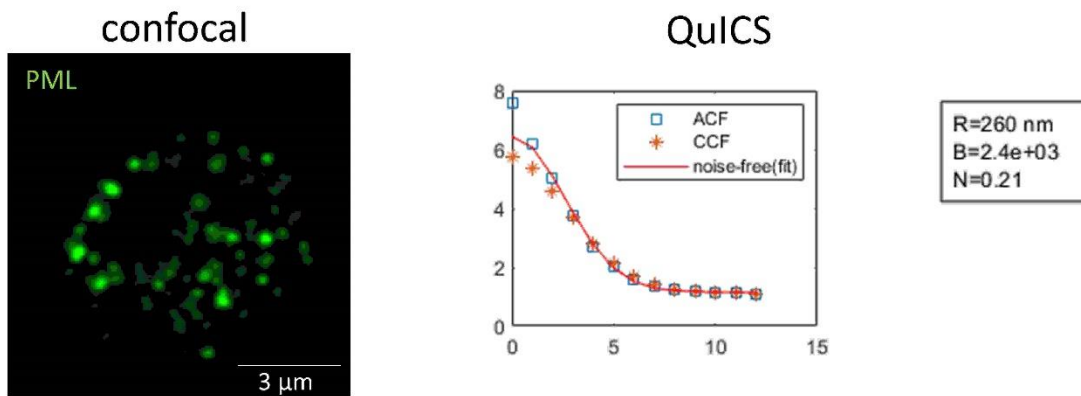

B

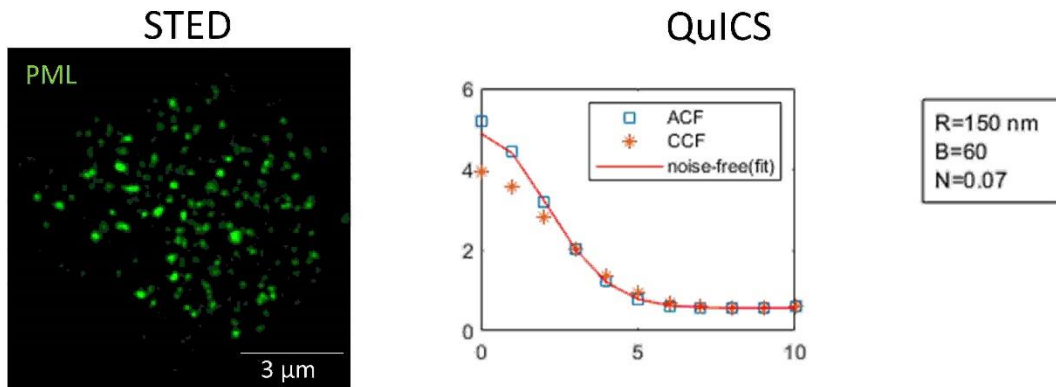

**Fig. S2. Confocal vs STED imaging of PML-RAR $\alpha$  microspeckles.**

A,B) (left) Representative confocal (A) and STED (B) images of PML-RAR $\alpha$  microspeckles in U937-PR9 cells at 8h after PML-RAR $\alpha$  expression induction. Scale bar 3  $\mu$ m. (right) QuICS analysis showing the value R representing the average apparent size of the PML-RAR $\alpha$  microspeckles in the selected images.

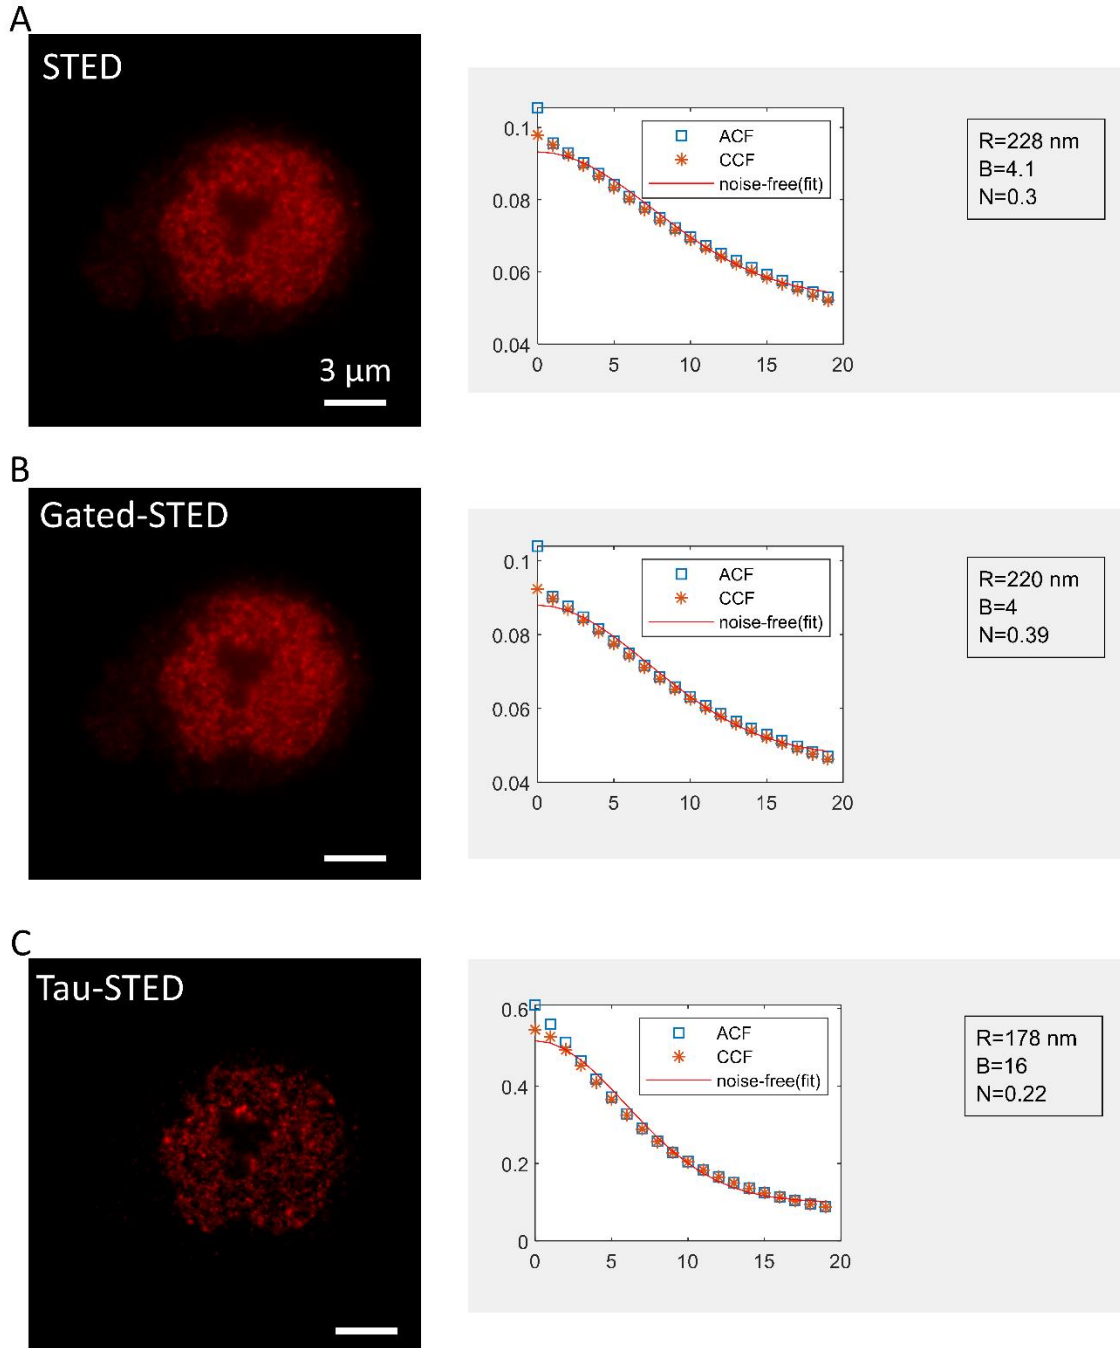

**Fig. S3. Comparison between different STED imaging modalities.**

A) Representative STED image of Pol2S2 in U937-PR9 cells (left) and evaluation of image quality by QuICS (right). B) Representative gated-STED (gating = 1 ns) image of Pol2S2 in U937-PR9 cells (left) and evaluation of image quality by QuICS (right). C) Representative Tau-STED image of Pol2S2 in U937-PR9 cells (left) and evaluation of image quality by QuICS (right). Scale bar 3  $\mu\text{m}$ .

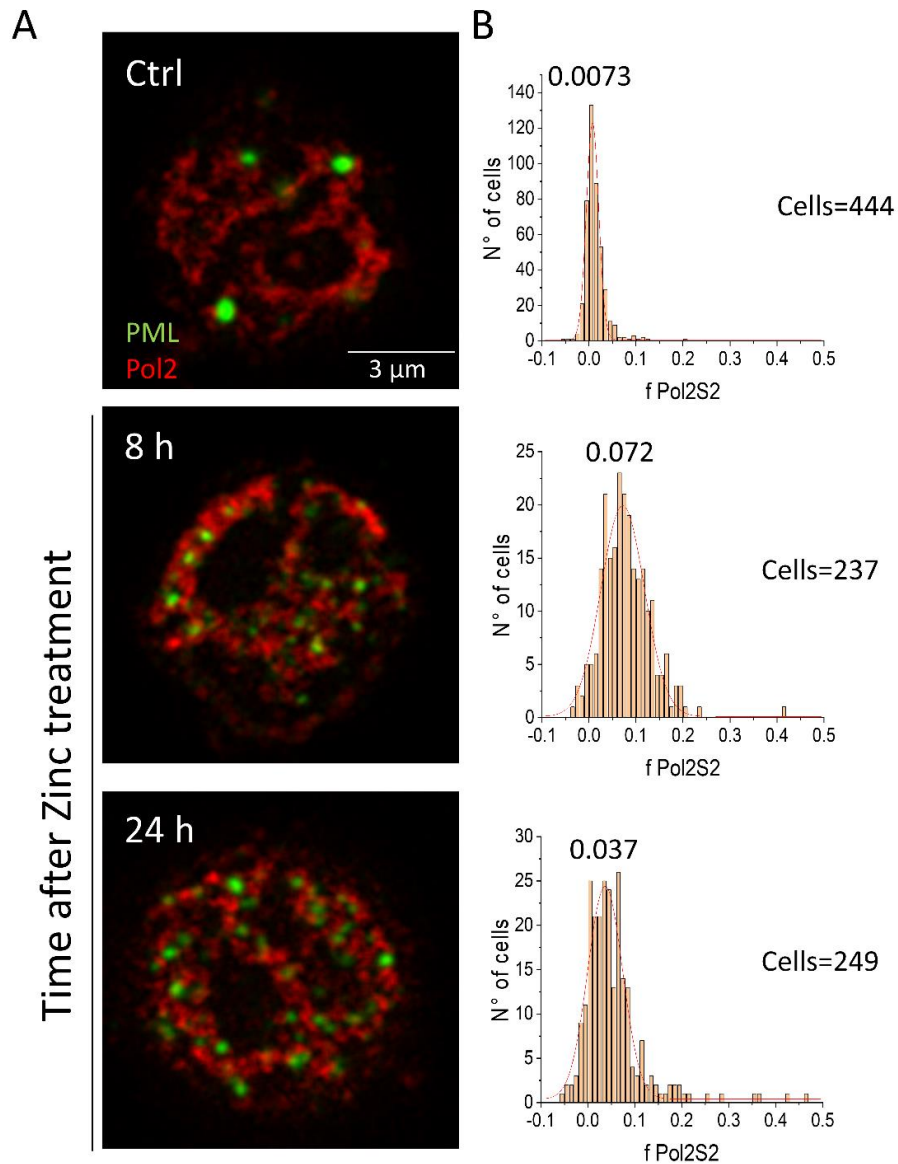

**Fig. S4. Confocal ICCS of PML/PML-RAR $\alpha$  and elongating Pol2**

A) Representative 2-color confocal images of PML/PML-RAR $\alpha$  (green) and Pol2S2 (red) in U937-PR9 cells before (ctrl) and after PML-RAR $\alpha$  expression induction, at the specified time point. Scale bar 3  $\mu\text{m}$ . B) Histograms show the distribution of the colocalization fraction  $f_{\text{Pol2S2}}$ , representing the fraction of Pol2S2 molecules colocalized with PML/PML-RAR $\alpha$  molecules. Red lines are Gaussian fits. Numbers represent the peak values.
